# Supplementary material
Source: PubMed Central journal article supplement (PMC7591155)
Supplement: NIHMS1634221-supplement-Supplementary_Tables.pdf [file NIHMS1634221-supplement-Supplementary_Tables.pdf]

**Supplementary Table 1. Correlation between clinical parameters and venetoclax AUC**

| Category                     | Person r | P (two-tailed) | P (Multi-test Corrected) | Case number |
|------------------------------|----------|----------------|--------------------------|-------------|
| Age                          | 0.068    | 0.307          | 6.14                     | 229         |
| %Monocytes in PB             | 0.436    | 6.89E-09       | 1.38E-07                 | 162         |
| %Blasts in BM                | -0.406   | 3.7E-07        | 7.4E-06                  | 146         |
| %Blasts in PB                | -0.351   | 7.42E-06       | 0.000148                 | 132         |
| %Neutrophils in PB           | 0.346    | 1.32E-05       | 0.000264                 | 151         |
| %Eosinophils in PB           | 0.221    | 0.00739        | 0.1478                   | 146         |
| MCV                          | 0.207    | 0.0208         | 0.416                    | 125         |
| %Immature Granulocytes in PB | 0.203    | 0.0502         | 1.004                    | 94          |
| Platelet Count               | 0.134    | 0.0744         | 1.488                    | 179         |
| Hematocrit                   | 0.137    | 0.0886         | 1.772                    | 156         |
| %Nucleated RBCs in PB        | -0.168   | 0.103          | 2.06                     | 95          |
| Hemoglobin                   | 0.124    | 0.124          | 2.48                     | 156         |
| Age at diagnosis             | 0.068    | 0.307          | 6.14                     | 226         |
| %Basophils in PB             | 0.078    | 0.371          | 7.42                     | 132         |
| WBC Count                    | -0.062   | 0.394          | 7.88                     | 194         |
| %Lymphocytes in PB           | 0.063    | 0.442          | 8.84                     | 152         |
| FAB                          | NA       | 0.0001         | 0.002                    | 226         |
| sample type                  | NA       | 0.3348         | 6.696                    | 226         |
| gender                       | NA       | 0.1008         | 2.016                    | 226         |
| disease stage                | NA       | 0.0031         | 0.062                    | 226         |
| ELN2017                      | NA       | 0.2018         | 4.036                    | 226         |

Significance was determined using either two tailed Mann-Whitney or Kruskal-Wallis tests (for categorical variables) or two tailed Pearson correlations (for continuous variables), and corrected for multiple comparisons (Bonferroni correction). PB: peripheral blood. BM: bone marrow. MCV: mean corpuscular volume. RBC: red blood cell. WBC: white blood cell. FAB: French-American-British classification. ELN: European LeukemiaNet.

**Supplementary Table 6. Custom capture genotyping gene list**

---

|        |        |       |        |        |        |       |       |
|--------|--------|-------|--------|--------|--------|-------|-------|
| ABL1   | ARID1A | ASXL1 | ATM    | ATRX   | BCOR   | CBL   | CCND3 |
| CEBPA  | CSF3R  | CTCF  | DIS3   | DNMT3A | EGFR   | EPHA3 | ETV6  |
| EZH2   | FBXO11 | FLT3  | GATA2  | IDH1   | IDH2   | IKZF1 | JAK2  |
| JAK3   | KDM6A  | KIT   | KRAS   | LAMA5  | MAU2   | MED12 | MLL2  |
| MPL    | MYC    | NF1   | NOTCH1 | NOTCH2 | NPM1   | NRAS  | PBRM1 |
| PDGFRB | PHF6   | PLCE1 | PTCH1  | PTEN   | PTPN11 | RAD21 | RUNX1 |
| SEMA3A | SETBP1 | SETD2 | SF3B1  | SMC1A  | SMC3   | SRSF2 | STAG2 |
| SUZ12  | TET1   | TET2  | TP53   | U2AF1  | WT1    | ZRSR2 |       |

---

This table is associated with Supplementary Data 4.
